# Supplementary material for: Drosophila orthologue of WWOX, the chromosomal fragile site FRA16D tumour suppressor gene, functions in aerobic metabolism and regulates reactive oxygen species
Source: PubMed Central journal article supplement — Hum Mol Genet. 2010 Nov 12;20(3):497–509. doi: 10.1093/hmg/ddq495 (PMC3016910; doi:10.1093/hmg/ddq495), 2010-11-12
Supplement: supp_ddq495_ddq495supp.pdf [file supp_ddq495_ddq495supp.pdf]

## Supplemental Information

### ***Drosophila* orthologue of WWOX, the chromosomal fragile site *FRA16D* tumour suppressor gene, functions in aerobic metabolism and regulates reactive oxygen species**

Louise V. O’Keefe\*, Alex Colella\*, Sonia Dayan, Qingwen Chen, Amanda Choo, Reuben Jacob, Gareth Price, Deon Venter and Robert I. Richards

## Inventory of Supplemental Information

### Supplemental Figures

Figure S1 is related to Figure 1

Table S1 is related to Figure 1.

Figure S2 is related to Figure 3.

Table S2 is related to Figure 3.

Figure S3 is related to Figure 3.

Figure S4 is related to Figure 4.

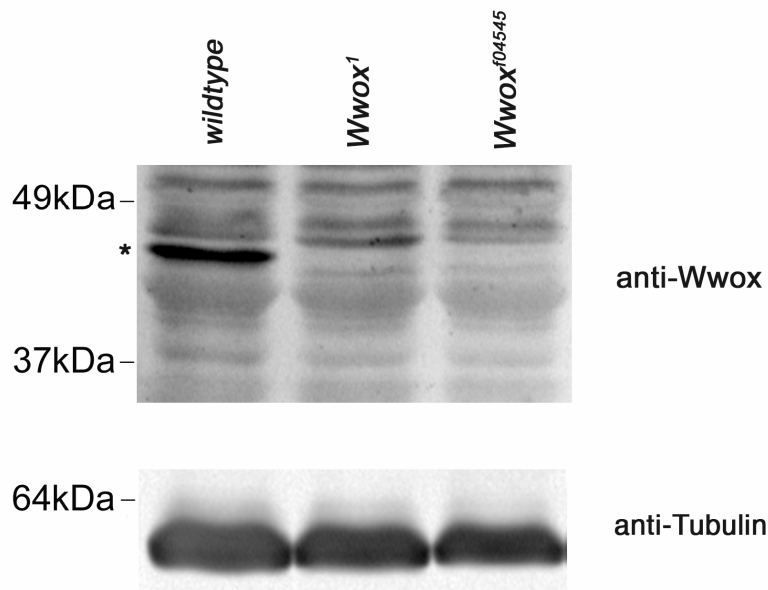

**Figure S1.** Related to Figure 1, Western analysis of Wwox protein levels in *Wwox<sup>1</sup>* and *Wwox<sup>104545</sup>* homozygous adult flies.

**(A)** Anti-Wwox antibody detects a band corresponding to Wwox (\*), as previously determined (28), that is absent in *Wwox<sup>1</sup>* as well as in *Wwox<sup>104545</sup>* adult mutant flies.

**(B)** Alpha Tubulin loading control.

Westerns were performed using anti-N-terminal Wwox antibody as previously described (28) with the following modifications: anti-Rabbit Cy5 secondary antibody was used at 1:2,500 (Rockland) and amplification of the signal was achieved using SignalBoost<sup>TM</sup> Immunoreaction Enhancer Kit (Calbiochem). Alpha Tubulin was detected using anti-alpha tubulin at 1:2000 (Sigma) and anti-mouse Alexa 488 at 1:2000 (Molecular Probes). Protein size markers are shown in kDaltons (kDa).

**Table S1. MS Identification of proteins in spots that exhibited significant changes in abundance as identified by DIGE. Related to Figure 1.**

| Spot                                                                     | Ave Ratio | T-test | Accession   | Name                                     | Combined# MOWSE score | Queries* Matched | Sequence coverage | Theoretical mol. mass (Da)/pI | Observed mol. mass (Da)/pI |
|--------------------------------------------------------------------------|-----------|--------|-------------|------------------------------------------|-----------------------|------------------|-------------------|-------------------------------|----------------------------|
| <b>w<sup>118</sup> vs Wwox<sup>1</sup> adults</b>                        |           |        |             |                                          |                       |                  |                   |                               |                            |
| 15                                                                       | 2.70      | 0.011  | gij24664081 | Fat body protein 1                       | 630 (35)              | 18 (9)           | 20%               | 119,666 / 6.39                | ~47,000 / 5.9              |
| 19                                                                       | 2.15      | 0.001  | gij8647     | Cu-Zn superoxide dismutase               | 94 (35)               | 2 (2)            | 20%               | 15,974 / 5.67                 | ~15,000 / 5.5              |
| 9                                                                        | 1.53      | 0.004  | gij8282     | Alcohol dehydrogenase                    | 114 (35)              | 4 (1)            | 19%               | 27,858 / 7.74                 | ~28,000 / 6.2              |
| 10                                                                       | 1.25      | 0.034  | gij20129399 | Aldehyde dehydrogenase                   | 212 (35)              | 8 (2)            | 16%               | 57,325 / 6.37                 | ~54,000 / 5.4              |
| 14 <sup>^</sup>                                                          | 1.16      | 0.006  | gij157561   | Glycerol-3-phosphate dehydrogenase       | 80(60)                | 7(0)             | 6%                | 35,351 / 8.42                 | ~37,000 / 6.1              |
| 5                                                                        | 1.14      | 0.006  | gij21358499 | CG7430                                   | 72(31)                | 4(1)             | 7%                | 53,565 / 6.41                 | ~54,000 / 5.65             |
| 12                                                                       | 1.14      | 0.006  | gij24650465 | CG31075                                  | 315(35)               | 8(4)             | 18%               | 52,607 / 6.64                 | ~54,000 / 5.55             |
| 25                                                                       | 1.13      | 0.017  | gij24649832 | CG11089                                  | 380 (35)              | 9 (7)            | 16%               | 63,797 / 7.97                 | ~65,000 / 7.65             |
| 13                                                                       | 1.10      | 0.003  | gij24650465 | CG31075                                  | 311(35)               | 9(5)             | 22%               | 52,607 / 6.64                 | ~54,000 / 5.85             |
| 23                                                                       | -1.08     | 0.003  | gij45550132 | Hsp60C                                   | 88 (35)               | 3 (1)            | 6%                | 61,890 / 6.75                 | ~60,000 / 5.1              |
| 2                                                                        | -1.12     | 0.003  | gij24648872 | CG6439 / Isocitrate dehydrogenase        | 83(31)                | 4(1)             | 10%               | 40,382 / 8.74                 | ~40,000 / 6.65             |
| 3                                                                        | -1.30     | 0.006  | gij24647881 | CG7998                                   | 138(35)               | 6(1)             | 26%               | 35,524 / 9.2                  | ~35,000 / 7.5              |
| 20                                                                       | -2.23     | 0.001  | gij8647     | Cu-Zn superoxide dismutase               | 63 (24)               | 1 (1)            | 9%                | 15,974 / 5.67                 | ~15,000 / 5.9              |
| <b>w<sup>118</sup>; da&gt;GAL4 vs w<sup>118</sup>; da&gt;Wwox adults</b> |           |        |             |                                          |                       |                  |                   |                               |                            |
| 16 <sup>^</sup>                                                          | 3.04      | 0.002  | gij24664081 | Fat body protein 1                       | 483 (60)              | 40 (6)           | 33%               | 119,350 / 5.82                | ~46,000 / 6.45             |
| 17                                                                       | 1.60      | 0.001  | gij7961     | Fat body protein 1                       | 273 (34)              | 6(4)             | 6%                | 119,350 / 5.82                | ~47,000 / 5.65             |
| 1                                                                        | 1.49      | 0.001  | gij20129347 | Wwox                                     | 101 (35)              | 2 (2)            | 8%                | 47052 / 7.19                  | ~35,000 / 6.10             |
| 6 <sup>^</sup>                                                           | 1.48      | 0.006  | gij7248650  | Malic enzyme                             | 128 (36)              | 4(1)             | 9%                | 84,368 / 7.23                 | ~60,000 / 5.8              |
| 7                                                                        | 1.43      | 0.019  | gij7248650  | Malic enzyme                             | 192 (35)              | 9(4)             | 19%               | 84,368 / 7.23                 | ~60,000 / 5.65             |
| 24                                                                       | 1.31      | 0.021  | gij20130249 | CG2852                                   | 45 (32)               | 1 (1)            | 9%                | 22,185 / 8.69                 | ~20,000 / 6.75             |
| 4                                                                        | 1.23      | 0.042  | gij17136394 | Phosphoglycerate kinase                  | 144 (32)              | 4 (1)            | 9%                | 44,119 / 7.01                 | ~45,000 / 6.45             |
| 28                                                                       | 1.22      | 0.006  | gij19921864 | CG8193                                   | 79 (35)               | 3 (1)            | 4%                | 79,520 / 6.49                 | ~80,000 / 6.35             |
| 8 <sup>^</sup>                                                           | 1.22      | 0.004  | gij157476   | Glyceraldehyde-3-phosphate dehydrogenase | 72 (60)               | 7 (0)            | 19%               | 35,351 / 8.42                 | ~35,000 / 6.4              |
| 27                                                                       | -1.23     | 0.047  | gij20130403 | Tudor-SN                                 | 593 (35)              | 14 (8)           | 18%               | 103,436 / 8.14                | ~100,000 / 6.5             |
| 19                                                                       | -1.23     | 0.035  | gij8647     | Cu-Zn Superoxide dismutase               | 94 (35)               | 2(2)             | 20%               | 15,988 / 5.85                 | ~15,000 / 5.45             |
| 26                                                                       | -1.26     | 0.013  | gij21358001 | CG14526                                  | 60 (35)               | 3 (1)            | 5%                | 79,172 / 5.69                 | ~80,000 / 5.7              |
| 21                                                                       | -1.37     | 0.046  | gij21357673 | CG5590                                   | 57 (32)               | 2 (1)            | 5%                | 44,611 / 8.11                 | ~46,000 / 7.15             |
| 22                                                                       | -1.43     | 0.001  | gij21357643 | CG7470                                   | 308 (34)              | 7 (4)            | 13%               | 84,093 / 6.71                 | ~85,000 / 5.7              |
| 11                                                                       | -1.57     | 0.031  | gij1079042  | Acetyl Coenzyme A synthase               | 60 (33)               | 2 (1)            | 4%                | 75,946 / 5.44                 | ~75,000 / 5.45             |
| 18                                                                       | -2.20     | 0.004  | gij24664081 | Fat body protein 1                       | 575 (43)              | 14 (8)           | 16%               | 119,350 / 5.82                | ~47,000 / 5.95             |

# Numbers in parentheses represents the peptide 'identity' threshold score

\* Numbers in parentheses represents number of queries over the peptide 'identity' threshold score

<sup>^</sup> Analysis performed using MALDI-TOF/TOF-MS

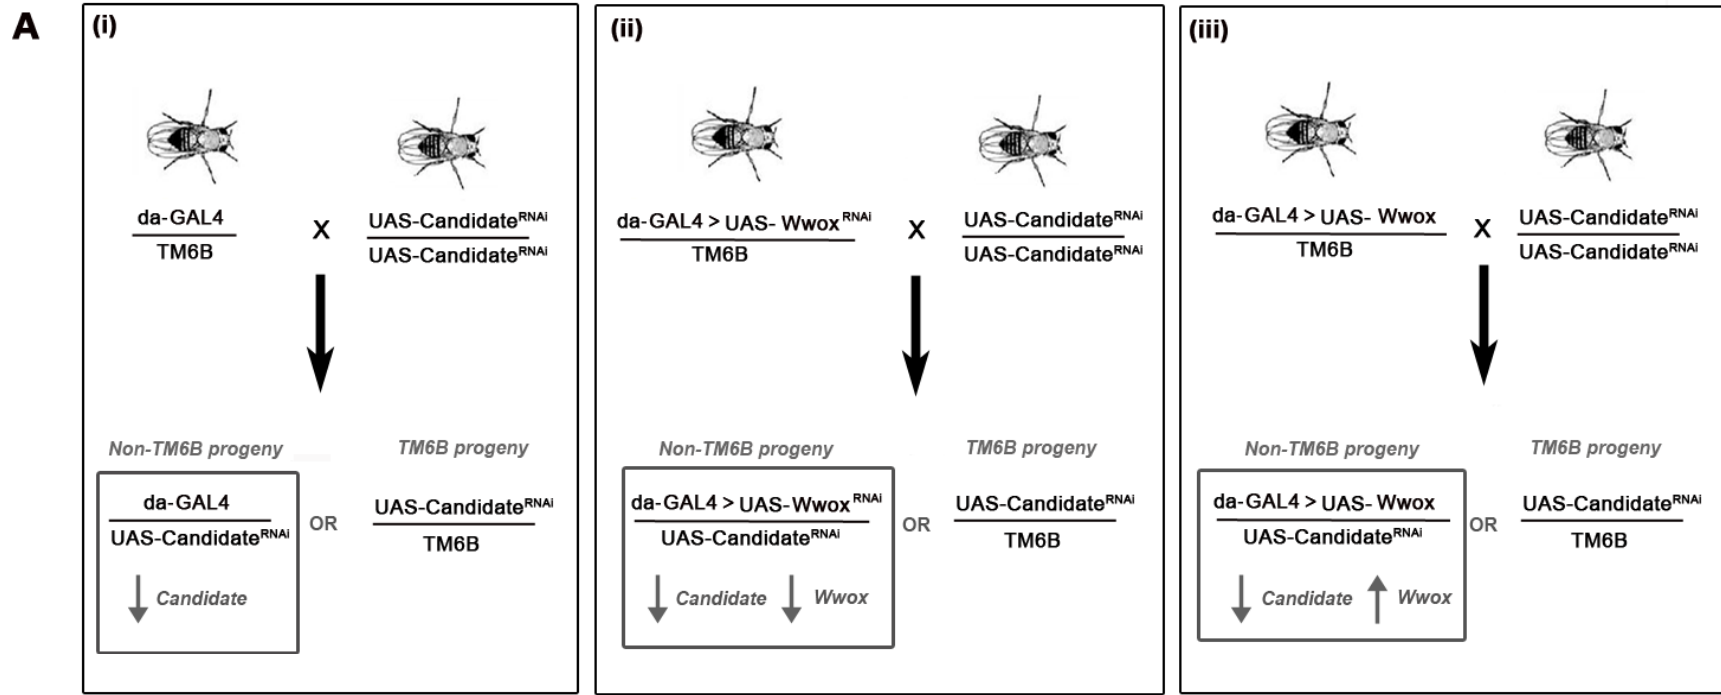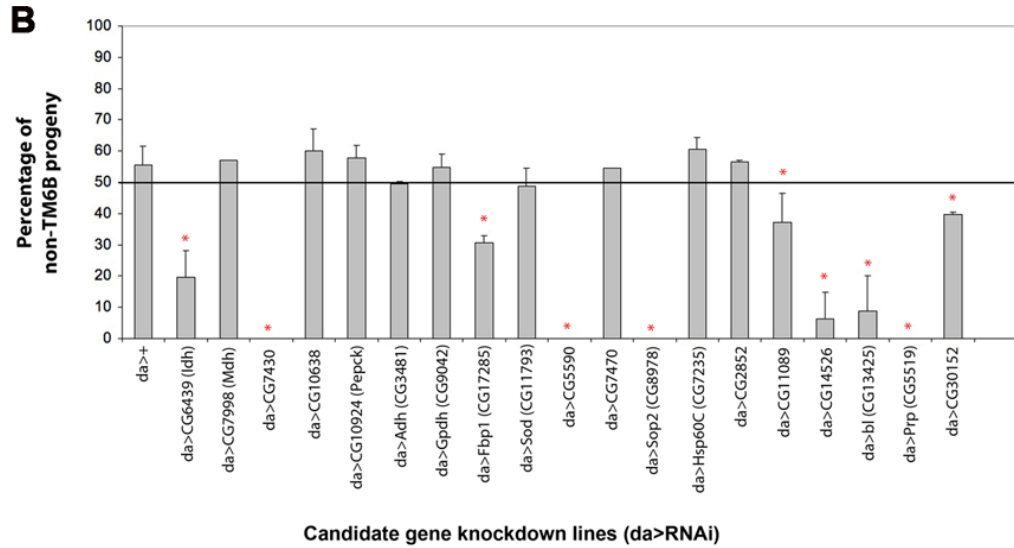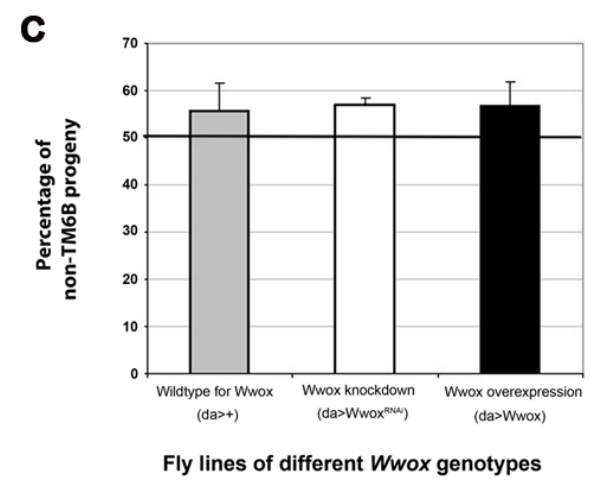

**Figure S2.** Related to Figure 3, effect of knocking down expression of *Wwox* candidate interactors and altering *Wwox* expression on viability in *Drosophila*.

**(A)** Crosses were set up for ubiquitous RNAi knockdown of the candidate gene either with normal levels of *WWOX* (i) or with altered (ii – decreased, iii – increased) levels of *WWOX*. The *da*-GAL4 driver was used to drive ubiquitous expression of the UAS constructs using the binary UAS-GAL4 system. From each cross, progeny of two different genotypes could be obtained at a 1:1 ratio, in accordance with Mendel's law of segregation. The two types of progeny obtained were those that carried a copy of the UAS-candidate RNAi construct with either the *da*-GAL4 driver (non-TM6B progeny, in which the candidate gene is ubiquitously knocked down) or the TM6B balancer (TM6B progeny, in which there is no knockdown of the candidate gene). Crosses with a minimum of 30 TM6B progeny were analysed and the ratio of non-TM6B: TM6B progeny were compared from (i), (ii) and (iii).

**(B)** Viability of *Drosophila* expressing candidate RNAi lines ubiquitously with the *da*-GAL4 driver. The percentage of non-TM6B progeny was scored for each RNAi line. The mean percentage for each RNAi line was compared to the expected percentage (50%, as indicated with the bold line) and error bars represent standard deviation of experimental replicates when the experiment has been replicated. Any negative deviation from the expected percentage was taken as an indication of reduced viability and “\*\*” denotes statistical significance ( $p < 0.05$ ) determined by t-test analysis.

**(C)** No significant difference in viability ( $0.90 \geq p > 0.10$ ) was observed when *Wwox* levels were increased (*da>Wwox*) or decreased (*da>Wwox*<sup>RNAi</sup>) compared to the wildtype control (*da>+*).

**Table S2: Summary of results from the viability screen testing the effect of altering *Wwox* levels in *Drosophila* expressing candidate RNAi constructs.**

| Gene name/symbol                               | VDRC line(s)       | Effect on viability with <i>da&gt;Wwox<sup>RNAi</sup></i> |           |                      | Effect on viability with <i>da&gt;Wwox</i> |   |                      |
|------------------------------------------------|--------------------|-----------------------------------------------------------|-----------|----------------------|--------------------------------------------|---|----------------------|
| <b>Reduced viability with <i>da-GAL4</i></b>   |                    |                                                           |           |                      |                                            |   |                      |
| <b>CG6439</b>                                  | 14443 <sup>^</sup> | #1                                                        | ↓         | P=0.256              | #1                                         | ↑ | P=0.757              |
|                                                |                    | #2                                                        | ↓         | P=0.768              | #2                                         | ↑ | P=0.072              |
|                                                |                    | #3                                                        | ↓         | <b>P&lt;0.001 **</b> | #3                                         | ↑ | <b>P=0.016 **</b>    |
|                                                |                    | #4                                                        | ↓         | <b>P=0.002 **</b>    | #4                                         | ↑ | <b>P&lt;0.001 **</b> |
|                                                |                    | #5                                                        | ↓         | P=0.405              | #5                                         | ↑ | <b>P&lt;0.001 **</b> |
| <b>CG11089</b>                                 | 31421              | #1                                                        | ↓         | P=0.185              | #1                                         | ↓ | P=0.238              |
|                                                |                    | #2                                                        | ↓         | <b>P=0.007 **</b>    | #2                                         | ↑ | P=0.471              |
| <b><i>Bancal/CG13425</i>‡</b>                  | 2912               | #1                                                        | ↓         | P=0.052              | #1                                         | ↓ | P=0.413              |
|                                                |                    | #2                                                        | ↓         | <b>P&lt;0.001 **</b> | #2                                         | ↓ | <b>P=0.003 **</b>    |
|                                                |                    | #3                                                        | No change |                      | #3                                         | ↑ | P=0.197              |
|                                                |                    | #4                                                        | No change |                      | #4                                         | ↑ | P=0.158              |
| <b>CG14526</b>                                 | 47138              | #1                                                        | ↑         | P=0.198              | #1                                         | ↓ | P=0.102              |
|                                                |                    | #2                                                        | ↑         | <b>P=0.036 **</b>    | #2                                         | ↓ | <b>P=0.005**</b>     |
|                                                | 47139              | #1                                                        | ↑         | P=0.565              | #1                                         | ↑ | P=0.096              |
|                                                |                    | #2                                                        | ↓         | P=0.529              | #2                                         | ↑ | P=0.933              |
|                                                | 39838 <sup>^</sup> | #1                                                        | ↓         | P=0.897              | #1                                         | ↑ | P=0.090              |
|                                                |                    | #2                                                        | ↑         | P=0.207              | #2                                         | ↑ | P=0.483              |
| <b><i>Fat body protein 1(Fbp1)/CG17285</i></b> | 37881              | #1                                                        | ↓         | P=0.425              | #1                                         | ↓ | P=0.685              |
|                                                |                    | #2                                                        | ↑         | P=0.613              | #2                                         | ↑ | P=0.215              |
| <b>CG30152</b>                                 | 38848              | #1                                                        | ↑         | P=0.520              | #1                                         | ↑ | P=0.132              |
|                                                |                    | #2                                                        | ↓         | <b>P=0.033 **</b>    | #2                                         | ↑ | P=0.663              |

**Lethal with *da-GAL4***

|                            |       |    |                        |  |    |                        |  |
|----------------------------|-------|----|------------------------|--|----|------------------------|--|
| <b><i>Prp19/CG5519</i></b> | 22147 | #1 | No rescue of lethality |  | #1 | No rescue of lethality |  |
|                            |       | #2 | No rescue of lethality |  | #2 | No rescue of lethality |  |
| <b>CG5590</b>              | 42040 | #1 | No rescue of lethality |  | #1 | No rescue of lethality |  |
|                            |       | #2 | No rescue of lethality |  | #2 | No rescue of lethality |  |
| <b>CG7430</b>              | 28011 | #1 | No rescue of lethality |  | #1 | No rescue of lethality |  |
| <b><i>Sop2/CG8978</i></b>  | 42171 | #1 | No rescue of lethality |  | #1 | No rescue of lethality |  |
|                            |       | #2 | No rescue of lethality |  | #2 | No rescue of lethality |  |

Related to Figure 3. 10 of the candidate genes identified by proteomic or microarray analysis were tested in this screen. For *CG14526*, line 47138 was the original line tested and included in Figure S1; lines 47139 and 39838 were later tested as two other independent lines for that gene. Numbers #1-5 refer to the number of experimental replicates tested for that particular RNAi line. The arrows indicate the direction in which altering WWOX levels affects the viability of the genotype. The p-values highlighted in grey indicate statistical significance ( $p < 0.05$ ) determined by chi-square test analysis.

<sup>^</sup>These RNAi lines have 1 reported off target (<http://stockcenter.vdrc.at>).

‡For candidate gene *Bancal/CG13425*, ubiquitously expressing the RNAi construct in *Drosophila* resulted in reduced viability in two experiments (#1 and #2) but complete lethality in two other replicates (#3 and #4). In experiments #3 and #4, decreasing WWOX levels in *Drosophila* expressing the *Bancal* RNAi construct also resulted in lethality, hence the results are reported as “no change”.

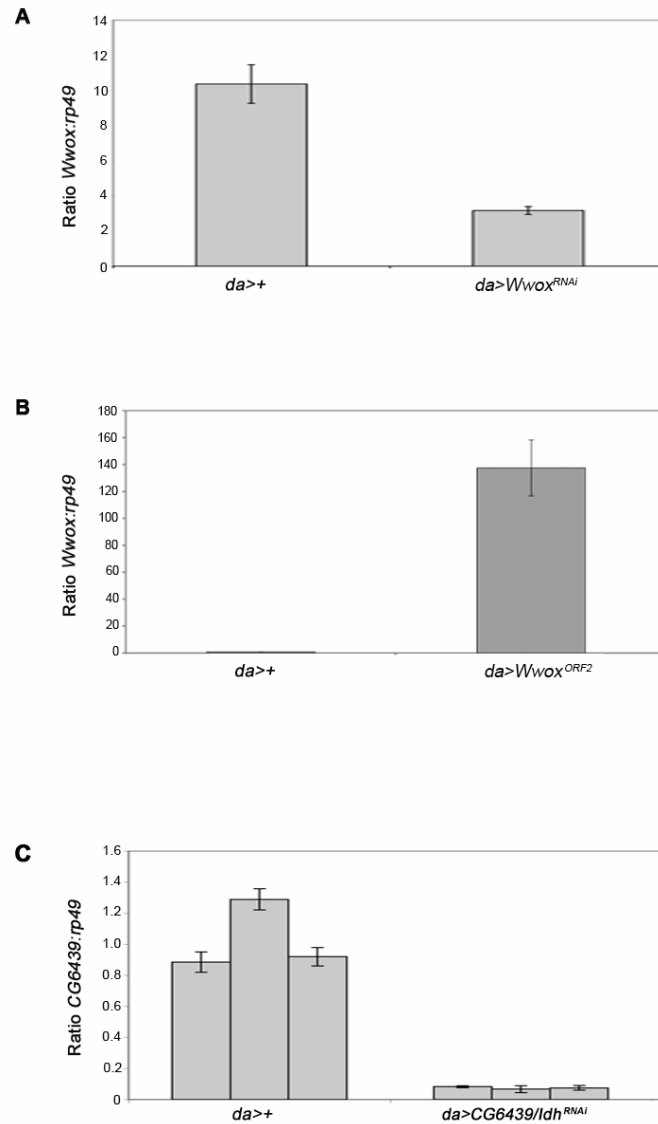

**Figure S3.** Related to Figure 3, qPCR analysis of *Wwox* and *CG6439* transcript levels in 3<sup>rd</sup> instar larvae.

**(A)** Ubiquitous expression of RNAi directed against *Wwox* (*da>Wwox<sup>RNAi</sup>*) resulted in knockdown of endogenous *Wwox* transcript levels compared to the control with the ubiquitous driver alone (*da>+*).

**(B)** Ubiquitous ectopic expression of *Wwox* open reading frame (ORF) under the daughterless promoter (*da>Wwox<sup>ORF</sup>*) results in increased levels of *Wwox* transcript compared to the control (*da>+*).

**(C)** Knockdown of endogenous *CG6439/l dh* transcripts was observed following ubiquitous expression of *CG6439/l dh<sup>RNAi</sup>* (*da>CG6439/l dh<sup>RNAi</sup>*) compared to the control (*da>+*).

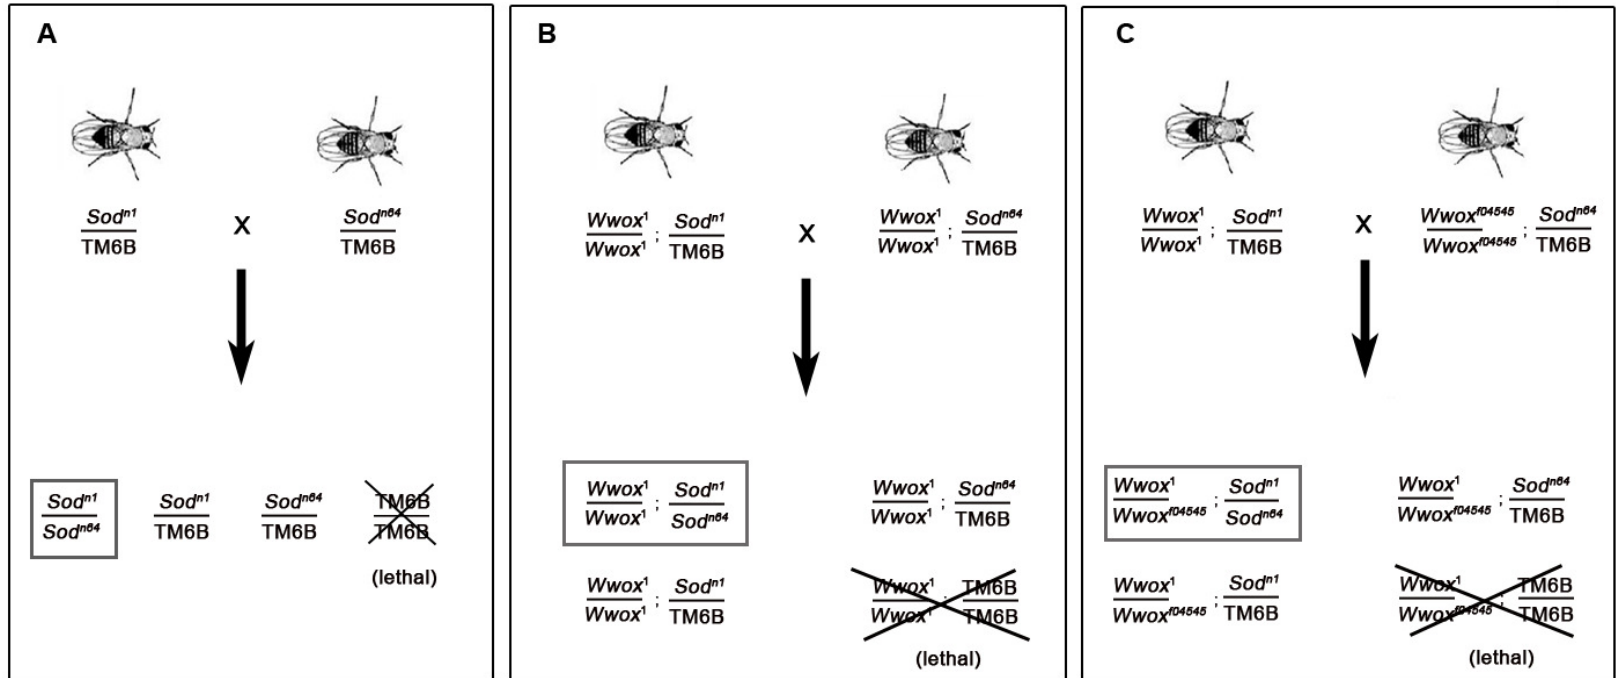

**Figure S4.** Related to Figure 4, crosses set up to test the effect of the *Wwox* mutations on the viability of *Drosophila* trans-heterozygous for the *Sod*<sup>n1</sup>/*Sod*<sup>n64</sup> mutations.

**(A)** In order to generate *Drosophila* that are trans-heterozygous for the *Sod*<sup>n1</sup>/*Sod*<sup>n64</sup> mutations, *Sod*<sup>n1</sup> flies that are balanced over a TM6B balancer were crossed to *Sod*<sup>n64</sup> flies balanced over a TM6B balancer. In accordance to Mendel's law of segregation, progeny of 4 different genotypes could be obtained at a 1:1:1:1 ratio. However, as having two copies of TM6B balancer results in lethality, only progeny of the 3 other genotypes were obtained and it was expected that 33.3% of the total progeny would be of the desired *Sod*<sup>n1</sup>/*Sod*<sup>n64</sup> genotype.

**(B) & (C)** Crosses set up to test the effect of the *Wwox* mutations on the viability of *Drosophila* trans-heterozygous for the *Sod*<sup>n1</sup>/*Sod*<sup>n64</sup> mutations. The percentage of progeny being *Wwox*;*Sod* double mutants out of the total progeny was calculated to determine if there was a decrease from the expected 33.3%.
